# Supplementary material for: A Macaque's-Eye View of Human Insertions and Deletions: Differences in Mechanisms
Source: PLOS journal article supplement (doi:10.1371/journal.pcbi.0030176), 2007-09-12
Supplement: S5 (10.1371/journal.pcbi.0030176.s005) [file journal.pcbi.0030176.s005]

A. Insertions

| Predictors | *t* valuea | Significanceb | VIFc | Variability Explainedd |
| --- | --- | --- | --- | --- |
| Divergence (linear term) | 6.9 | < 10-4 | 2.6 | 0.12 |
| *Divergence (quadratic term)* | -8.3 | < 10-4 | 1.8 |
| SINE count | 8.2 | < 10-4 | 3.1 | 0.11 |
| Distance to the telomere (linear term) | -9.5 | < 10-4 | 2.0 | 0.15 |
| *Distance to the telomere (quadratic term)* | 6.3 | < 10-4 | 1.7 |
| Female recombination rate | 6.6 | < 10-4 | 1.3 | 0.07 |
| Male recombination rate | n.s.e | n.s. | n.s. | n.s. |
| GC content (linear term) | -5.1 | < 10-4 | 3.5 | 0.04 |
| CpG island count (linear term) | n.s. | n.s. | n.s. | 0.04 |
| *CpG island count (quadratic term)* | 4.7 | < 10-4 | 3.3 |
| Poly(A/T)n content (linear term) | 4.5 | < 10-4 | 2.4 | 0.03 |
| *Poly(A/T)n content (quadratic term)* | -3.1 | 2.8 x10-2 | 2.1 |
| Gene content | 3.4 | 9.5 x10-3 | 1.3 | 0.02 |
| LINE count | n.s. | n.s. | n.s. | n.s. |
| Multiple R2 |  |  |  | 0.20 |
| Adjusted R2 |  |  |  | 0.20 |

a*t* value – test statistic of null hypothesis that each predictor’s coefficient is equal to zero

b*P* values adjusted for multiple tests (using Bonferroni correction)

cVIF – variance inflation factor (see Materials and Methods)

dRelative contribution to explained variability computed for each predictor (see Materials and Methods)

en.s. – non-significant (*P* > 0.05)

The predictors are shown in the order of their relative contribution to explained variability for insertions in Table 1, except for the two recombination rates listed together.

B. Deletions

| Predictors | *t* valuea | Significanceb | VIFc | Variability Explainedd |
| --- | --- | --- | --- | --- |
| Divergence (linear term) | 12 | < 10-4 | 2.5 | 0.23 |
| *Divergence (quadratic term)* | -8.9 | < 10-4 | 1.7 |
| SINE count (linear term) | -9.5 | < 10-4 | 4.0 | 0.15 |
| *SINE count (quadratic term)* | 3.6 | 3.6x10-3 | 2.4 |
| Distance to the telomere | -3.1 | 2.6 x10-2 | 1.3 | 0.01 |
| Female recombination rate | n.s.e | n.s. | n.s. | n.s. |
| Male recombination rate | 4.5 | < 10-4 | 1.4 | 0.03 |
| GC content | -6.3 | < 10-4 | 6.1 | 0.06 |
| CpG island count | n.s. | n.s.. | n.s. | n.s. |
| Poly(A/T)n content | 3.1 | 2.6 x10-2 | 1.1 | 0.01 |
| Gene content | n.s. | n.s. | n.s. | n.s. |
| LINE count | 5.3 | < 10-4 | 1.1 | 0.04 |
| Multiple R2 |  |  |  | 0.21 |
| Adjusted R2 |  |  |  | 0.21 |

a*t* value – test statistic of null hypothesis that each predictor’s coefficient is equal to zero

b*P* values adjusted for multiple tests (using Bonferroni correction)

cVIF – variance inflation factor (see Materials and Methods)

dRelative contribution to explained variability computed for each predictor (see Materials and Methods)

en.s. – non-significant (P > 0.05)

The predictors are shown in the order of their relative contribution to explained variability for insertions in Table 1, except for the two recombination rates listed together.
